1 **Title:** Contribution of sensory encoding to measured bias

2

3 **Authors:** Miaomiao Jin and Lindsey L. Glickfeld

4

5 **Affiliation:** Department of Neurobiology, Duke University Medical Center, Durham,  
6 North Carolina 27710

7

8 **Corresponding Author and Lead Contact:**

9 Lindsey Glickfeld

10 Department of Neurobiology

11 Duke Medical School

12 311 Research Drive, BRB-401F

13 Durham, NC 27710

14 email: [glickfeld@neuro.duke.edu](mailto:glickfeld@neuro.duke.edu)

15

16 **Number of Pages:** 29

17

18 **Number of Figures:** 4 main and 4 supplementary

19

20 **Number of words:** Abstract (247), Introduction (656), Results (1899), Discussion  
21 (1030)

22

23 **Keywords:** signal detection theory, mouse visual cortex, adaptation, orientation,  
24 optogenetics, sensitivity, contrast, psychophysics

25

26

27 **Abstract:**

28  
29 Perceptual decision-making is a complex process that involves sensory integration  
30 followed by application of a cognitive threshold. Signal detection theory (SDT) provides  
31 a mathematical framework for attributing the underlying neurobiological processes to  
32 these distinct phases of perceptual decision-making. In particular, SDT reveals the  
33 sensitivity ( $d'$ ) of the neuronal response distributions and the bias ( $c$ ) of the decision  
34 criterion, which are commonly thought to reflect sensory and cognitive processes,  
35 respectively. However, neuronal representations of bias have been observed in sensory  
36 areas, suggesting that some changes in bias are due to effects on sensory encoding.  
37 To directly test whether sensory encoding can influence bias, we optogenetically  
38 manipulated neuronal excitability in primary visual cortex (V1) during a detection task.  
39 Increasing excitability in V1 significantly decreased behavioral bias, while decreasing  
40 excitability had the opposite effect. To determine whether this change in bias is  
41 consistent with the effects on sensory encoding, we made extracellular recordings from  
42 V1 neurons in passively viewing mice. Indeed, we found that optogenetic manipulation  
43 of excitability shifted the neuronal bias in the same direction as the behavioral bias,  
44 despite using a fixed artificial decision criterion to predict hit and false alarm rates from  
45 the neuronal firing rates. To test the generality these effects, we also manipulated the  
46 quality of V1 encoding by changing stimulus contrast or inter-stimulus interval. These  
47 stimulus manipulations also resulted in consistent changes in bias measured both  
48 behaviorally and neuronally. Thus, changes in sensory encoding are sufficient to drive  
49 changes in bias measured using SDT.

50  
51 **Introduction:**

52  
53 Perceptual decision-making is a multi-step process through which sensory information  
54 about the external world is first transformed into a neuronal code and then used to make  
55 a behavioral choice. In this process, both sensory encoding and the cognitive aspects of  
56 the decision-making process are critical factors that determine the final choice (Gold

57 and Shadlen, 2007; Carandini and Churchland, 2013; Romo and de Lafuente, 2013;  
58 Hanks and Summerfield, 2017).

59  
60 Efforts to dissect the relative contribution sensory and cognitive processes to decision-  
61 making often take advantage of signal detection theory (SDT), a classical and widely  
62 used method that allows inference of the underlying neuronal response distributions and  
63 decision criteria from behavioral measures (Green and Swets, 1966). In particular, SDT  
64 allows the use of hit and false alarm (FA) rates to extract two aspects of the perceptual  
65 decision: sensitivity ( $d'$ ) and bias ( $c$ ). Measures of sensitivity allow inference of the  
66 separability of the underlying neuronal activity evoked in response to targets and  
67 distractors. Thus, this measure is thought to reflect the quality of encoding in sensory  
68 circuits that provide input to the decision-making circuits (Bashinski and Bacharach,  
69 1980; Bennett et al., 2013; Pinto et al., 2013; Luo and Maunsell, 2015; Jurjut et al.,  
70 2016; Ni et al., 2017). On the other hand, bias measures the overall tendency to classify  
71 the stimulus as a target or distractor. Thus, it can reflect the subject's decision criterion.  
72 In fact,  $c$  is often used synonymously with "criterion" and is therefore commonly thought  
73 to reveal cognitive contributions to the decision-making process and involve areas  
74 downstream of sensory cortex (McDonald et al., 2000; Grove et al., 2012; Jones et al.,  
75 2015; Crapse et al., 2017; de Gee et al., 2017; Luo and Maunsell, 2018; van Vugt et al.,  
76 2018).

77  
78 However, neuronal correlates of bias have also been identified in sensory cortical areas.  
79 Human neuroimaging experiments have found a strong correlation between the strength  
80 of representation of prior information (such as expected stimulus features or locations)  
81 in sensory areas and the strength of behavioral bias (White et al., 2012; Kok et al.,  
82 2013; Vintch and Gardner, 2014). Similarly, spontaneous fluctuations in the excitability  
83 of sensory cortical areas correlate with spontaneous fluctuations in behavioral bias (Iemi  
84 et al., 2017). These data suggest that activity in sensory areas can influence behavioral  
85 bias. However, it is not clear whether this is due to a direct effect of sensory encoding  
86 on bias or the result of a bidirectional interaction between sensory and cognitive  
87 systems.

88

89 In fact, there is a clear mathematical explanation for how changes in sensory encoding  
90 can alter behavioral bias (Witt et al., 2015). Since bias is always measured relative to  
91 the optimal criterion (**Figure 1a**), changes in sensory encoding that shift the optimal  
92 criterion have the potential to result in changes in measured bias. This happens any  
93 time that changes in the responses to the target and distractor are not opposite and  
94 proportional. Thus, many manipulations that alter sensory encoding, ranging from  
95 adaptation to attention, might be expected to cause changes in bias in addition to  
96 sensitivity, even in the absence of a cognitive contribution.

97

98 To directly test whether changes in sensory encoding are sufficient to affect bias, we  
99 trained mice on an orientation discrimination task in which we could 1) measure hit and  
100 FA rate to calculate bias and sensitivity and 2) control the neuronal responses to both  
101 targets and distractors. Altering responses to targets and distractors through either  
102 direct optogenetic manipulation of neurons in primary visual cortex (V1) or manipulation  
103 of visual stimulus properties results in a reliable change in behavioral bias with relatively  
104 little impact on sensitivity. Further, electrophysiological recordings from neurons in V1  
105 during each of these manipulations also revealed a strong effect on bias in the same  
106 direction as during behavior. Thus, changes in bias can be driven by changes in either  
107 cognitive factors or sensory encoding, and the lack of a change in sensitivity does not  
108 preclude a change in sensory encoding.

109

## 110 **Results**

111

112 To explore whether purely sensory changes can affect measured bias in perceptual  
113 decision-making, we designed an orientation discrimination task to allow measures of  
114 hit and false alarm (FA) rate (**Figure 1b**). In this task, a head-fixed mouse presses a  
115 lever to initiate trials and releases it to report a target orientation. Each trial begins with  
116 the repeated presentation of at least two (and up to nine) iso-oriented gratings  
117 ('distractors', 100 ms duration) followed by a counterclockwise change in orientation  
118 relative to the distractor ('target', range: 9-90°; **Figure 1c**). If the mouse releases the

119 lever within a window 200-550 ms following the onset of the target stimulus, it is  
120 considered a hit; if the mouse releases the lever within the same window following a  
121 distractor stimulus, it is considered a FA. Thus, we can use these behavioral measures  
122 to calculate sensitivity and bias using SDT (Green and Swets, 1966).

123  
124 In addition to being appropriate for making measurements of SDT, this task has a  
125 couple of additional advantages. First, the mice can perform the task at a high level of  
126 proficiency with low lapse rates ( $0.053 \pm 0.008$ ; range 0.003-0.107;  $n=14$  mice), FA rates  
127 ( $0.048 \pm 0.004$ ; range 0.032-0.098;  $n=14$  mice) and threshold for orientation  
128 discrimination ( $25.2^\circ \pm 1.3^\circ$ ; range  $14.2^\circ$ - $32.0^\circ$ ;  $n=14$  mice). Thus, there are minimal  
129 concerns about changes in motivational state or arousal that could influence our  
130 measures of bias. Second, we have a good idea of how neuronal activity in primary  
131 visual cortex (V1) is used to perform the behavior (Jin et al., 2018). Namely, the  
132 decision-making circuits sum V1 spike rates, with particular weight on the neurons that  
133 prefer targets. Thus, the decision variables and decision criterion are in units of firing  
134 rate, and manipulations that coincidentally alter firing rates in response to distractors and  
135 targets will change the optimal criterion and therefore induce a change in measured  
136 bias (**Figure 1a**).

137  
138 **Direct suppression and activation of V1 alters both behavioral and neuronal**  
139 **measures of bias**

140  
141 To directly test the contribution of sensory encoding in V1 to measures of bias, we  
142 optogenetically manipulated the firing rates (FR) of V1 neurons. We virally or genetically  
143 expressed excitatory opsins (ChR2 or Chronos) in either inhibitory or excitatory neurons  
144 using transgenic mouse lines (PV::Cre or VGAT-ChR2 and EMX1::Cre). We then used  
145 blue light to suppress or excite V1 neurons specifically during presentation of targets or  
146 distractors either during performance of the orientation discrimination task (**Figure 1b-c**)  
147 or in passively viewing mice (**Figure 1d-e**). Indeed, extracellular recordings from V1  
148 neurons reveal that optogenetic activation of inhibitory neurons significantly reduces  
149 neuronal responses to both targets near the animals' discrimination threshold and

150 distractors (FR changes by V1 suppression: 22.5°:  $-6.6 \pm 1.2$  Hz,  $p < 10^{-9}$ ; 0°:  $-5.5 \pm 1.2$  Hz,  
151  $p < 10^{-10}$ ;  $n=70$  cells; Wilcoxon signed rank test; an example experiment in **Figure 1e** and  
152 all cells in **Figure S1c**), while activation of excitatory neurons increases visually driven  
153 responses (FR changes by V1 excitation: 22.5°:  $2.6 \pm 0.4$  Hz,  $p < 10^{-8}$ ; 0°:  $2.5 \pm 0.3$  Hz,  
154  $p < 10^{-11}$ ;  $n=83$  cells; Wilcoxon signed rank test; an example experiment in **Figure 1e** and  
155 all cells in **Figure S1g**). Moreover, the waveform shapes between control and  
156 optogenetic manipulations remain relatively similar (correlation coefficient: control vs.  
157 V1 suppression:  $0.993 \pm 0.001$ ; control vs. V1 excitation:  $0.997 \pm 0.001$ ; **Figure S1b,f**).  
158 Importantly, these effects are largely selective for the targeted stimulus as we see little  
159 to no effect on stimuli ( $\text{Stim}_N$ ) for which the preceding stimulus ( $\text{Stim}_{N-1}$ ) was  
160 optogenetically manipulated (FR changes by V1 suppression: 22.5°:  $-1.2 \pm 0.6$  Hz,  
161  $p=0.02$ ; 0°:  $-0.5 \pm 0.4$  Hz,  $p=0.50$ ; FR changes by V1 excitation: 22.5°:  $-0.2 \pm 0.3$  Hz,  
162  $p=0.58$ ; 0°:  $-0.03 \pm 0.11$  Hz,  $p=0.79$ ; Wilcoxon signed rank test; **Figure S1d,h**).

163  
164 Consistent with activation of inhibitory interneurons reducing firing rates, and therefore  
165 the decision variable, we find that optogenetic suppression of activity in V1 reduces  
166 behavioral hit rate (22.5° target: V1 suppression vs. Control:  $p < 0.005$ ;  $n=4$  mice; paired  
167 t-test; **Figure 2a**) and FA rate (V1 suppression vs. Control:  $p < 0.05$ ;  $n=4$  mice; paired t-  
168 test). These associated changes in both hit and FA rate often reflect changes in bias ( $c$ )  
169 measured by SDT. Indeed, using SDT we find a significant increase in measured bias ( $c$ )  
170 for 22.5° target: V1 suppression vs. Control:  $p < 0.005$ ; paired t-test; **Figure 2b**) and a  
171 slight decrease in sensitivity ( $d'$  for 22.5° target: V1 suppression vs. Control:  $p=0.05$ ;  
172 paired t-test). Conversely, optogenetic excitation of V1 increases behavioral hit rates  
173 (22.5° target: V1 excitation vs. Control:  $p < 0.01$ ;  $n=4$  mice; paired t-test; **Figure 2a**) and  
174 FA rate (V1 excitation vs. Control:  $p < 0.01$ ;  $n=4$  mice; paired t-test), resulting in a  
175 decrease in measured bias ( $c$  for 22.5° target: V1 excitation vs. Control:  $p < 0.005$ ; paired  
176 t-test; **Figure 2b**) and a slight decrease in sensitivity ( $d'$  for 22.5° target: V1 excitation  
177 vs. Control:  $p=0.05$ ; paired t-test).

178  
179 To test whether the changes in firing rate can qualitatively account for the changes in  
180 behavioral bias, we used the neuronal data to directly measure bias by applying an

181 artificial decision criterion. We set the criterion to optimally discriminate the  
182 optogenetically suppressed distractors ( $0^\circ$ ) from targets in the control condition ( $22.5^\circ$ )  
183 in each cell, and then used the distributions of neuronal responses to calculate hit and  
184 FA rate across conditions. Suppressing neuronal activity in V1 decreases the predicted  
185 hit rate ( $22.5^\circ$  target: V1 suppression vs. Control:  $p < 10^{-6}$ ;  $n=47$  cells; Wilcoxon signed  
186 rank test; **Figure 2c**) and FA rate (V1 suppression vs. Control:  $p < 10^{-7}$ ;  $n=47$  cells;  
187 Wilcoxon signed rank test) leading to an increase in measured bias ( $c$  for  $22.5^\circ$  target:  
188 V1 suppression vs. Control:  $p < 10^{-7}$ ; Wilcoxon signed rank test; **Figure 2d**) without  
189 significantly changing the sensitivity ( $d'$  for  $22.5^\circ$  target: V1 suppression vs. Control:  
190  $p=0.12$ ; Wilcoxon signed rank test). Conversely, activating neuronal activity in V1  
191 increases predicted hit ( $22.5^\circ$  target: V1 excitation vs. Control:  $p < 0.001$ ;  $n=45$  cells;  
192 Wilcoxon signed rank test; **Figure 2c**) and FA rate (V1 excitation vs. Control:  $p < 10^{-6}$ ;  
193  $n=45$  cells; Wilcoxon signed rank test), resulting in a decrease in measured bias ( $c$  for  
194  $22.5^\circ$  target: V1 excitation vs. Control:  $p < 10^{-5}$ ; Wilcoxon signed rank test; **Figure 2d**)  
195 and sensitivity ( $d'$  for  $22.5^\circ$  target: V1 excitation vs. Control:  $p < 0.001$ ; Wilcoxon signed  
196 rank test). Thus, our electrophysiology data shows that manipulating excitability of  
197 neurons in V1 is sufficient to alter bias even in the absence of a flexible decision  
198 criterion. Moreover, the neuronal and behavioral changes in bias are in the same  
199 direction, suggesting that the changes in sensory encoding could be responsible for the  
200 changes in behavioral bias.

201

## 202 **Manipulation of stimulus contrast affects measures of bias**

203

204 Optogenetic tools allow for the direct manipulation of firing rates, however any  
205 manipulation that coincidentally increases or decreases firing rates in response to targets  
206 and distractors are predicted to impact measures of bias. For instance, neurons in V1  
207 have monotonic contrast-response functions (Gao et al., 2010), and therefore  
208 decreasing stimulus contrast should decrease firing rates in response to both targets  
209 and distractors, shifting the optimal criterion to lower stimulus values. Thus, we modified  
210 our orientation discrimination task to vary stimulus contrast (30%, 50% and 70%) on a  
211 presentation-by-presentation basis (**Figure 3a**). Extracellular recordings confirm that

212 manipulation of contrast significantly affected firing rates in response to both targets  
213 (22.5°: FR changes from 70% to 30%:  $-4.5 \pm 0.7$  Hz,  $p < 10^{-7}$ ;  $n=92$  cells; Friedman test  
214 ( $p < 10^{-8}$ ) with post-hoc Tukey HSD test; **Figure S3a**) and distractors (0°: FR changes  
215 from 70% to 30%:  $-4.2 \pm 0.5$  Hz,  $p < 10^{-9}$ ;  $n=92$  cells; Friedman test ( $p < 10^{-25}$ ) with post-hoc  
216 Tukey HSD test; **Figure S3b**).

217  
218 Consistent with lower stimulus contrast driving lower firing rates, we find that decreasing  
219 stimulus contrast significantly reduces the animal's hit rate (22.5° target:  $p < 0.05$ ;  $n=5$   
220 mice; one-way anova ( $p=0.05$ ) with post-hoc Tukey HSD test; **Figure 3b**) and FA rate  
221 (70% vs. 30%:  $p < 0.005$ ;  $n=5$  mice; one-way anova ( $p < 0.005$ ) with post-hoc Tukey HSD  
222 test). These changes in hit and FA rate drive a significant increase in bias ( $c$  for 22.5°  
223 target: 70% vs. 30%:  $p < 0.005$ ;  $n=5$  mice; one-way anova ( $p < 0.005$ ) with post-hoc Tukey  
224 HSD test; **Figure 3c**) without a significant change in sensitivity ( $d'$  for 22.5° target:  
225  $p=0.81$ ;  $n=5$  mice; one-way anova).

226  
227 As with optogenetic manipulation of neuronal activity, the effects of manipulating visual  
228 stimulus features on behavior are consistent with the changes in V1 activity. Lowering  
229 stimulus contrasts decreases both the predicted hit rate (22.5° target: 70% vs. 30%:  
230  $p < 0.05$ ; Friedman test ( $p < 0.01$ ) with post-hoc Tukey HSD test; **Figure 3e**) and FA rate  
231 (0°: 70% vs. 30%:  $p < 10^{-5}$ ; Friedman test ( $p < 10^{-6}$ ) with post-hoc Tukey HSD test),  
232 resulting in an increase in measured bias ( $c$  for 22.5° target: 70% vs. 30%:  $p < 10^{-3}$ ;  
233 Friedman test ( $p < 10^{-3}$ ) with post-hoc Tukey HSD test; **Figure 3f**) without significantly  
234 changing the predicted sensitivity ( $d'$  for 22.5° target:  $p=0.08$ ; Friedman test). Thus,  
235 changes in the quality of sensory encoding through variation of visual stimulus  
236 properties can affect behavioral and neuronal measures of bias.

237  
238 **Manipulation of adaptation state affects measures of bias**

239 Varying stimulus contrast revealed that stimulus manipulations of sensory encoding can  
240 affect measured bias. In order to demonstrate the ubiquity of this phenomenon, we  
241 manipulated a different property of the task design that affects sensory encoding: inter-  
242 stimulus interval (ISI; 250, 500 and 750 ms; **Figure 4a**). Varying the ISI, like varying



243 contrast, alters the strength of sensory responses, where shorter ISIs drive suppressive  
244 adaptation and lower firing rates (Clifford et al., 2007; Jin et al., 2018). Indeed,  
245 extracellular recordings revealed that adaptation significantly decreases the neuronal  
246 responses to distractors ( $0^\circ$ : FR changes from 750 ms to 250 ms ISI:  $-3.9 \pm 0.8$  Hz,  $p < 10^{-8}$ ;  
247  $n=74$  cells; Friedman test ( $p < 10^{-9}$ ) with post-hoc Tukey HSD test; **Figure S4b**), while  
248 slightly, but not significantly, decreasing responses to targets ( $22.5^\circ$ : FR changes from  
249 750 ms to 250 ms ISI:  $-2.4 \pm 0.8$  Hz,  $p=0.17$ ;  $n=74$  cells; Friedman test; **Figure S4a**).  
250 While there is an asymmetric effect of ISI on targets and distractors (consistent with the  
251 stimulus specific effects of adaptation (Müller et al., 1999; Dragoi et al., 2000)), the net  
252 effect of adaptation is to reduce firing rates and this should decrease the optimal  
253 criterion and therefore increase bias.

254  
255 Consistent with this prediction, decreasing the ISI decreases both hit rate ( $22.5^\circ$  target:  
256 750 ms vs. 250 ms:  $p < 0.05$   $n=11$  mice; one-way anova ( $p < 0.05$ ) with post-hoc Tukey  
257 HSD test; **Figure 4b**) and FA rate (750 ms vs. 250 ms:  $p < 10^{-8}$ ;  $n=11$  mice; one-way  
258 anova ( $p < 10^{-8}$ ) with post-hoc Tukey HSD test). The decrease in both hit and FA rate  
259 support an increase in measured bias ( $c$  for  $22.5^\circ$  target: 750 ms vs. 250 ms:  $p < 10^{-4}$ ;  
260  $n=11$  mice; one-way anova ( $p < 10^{-3}$ ) with post-hoc Tukey HSD test; **Figure 4c**), without  
261 a coincident change in sensitivity ( $d'$  for  $22.5^\circ$  target:  $p=0.85$ ; one-way anova).

262  
263 As with manipulating contrast, the behavioral effects of manipulating ISI are expected  
264 from the observed changes in neuronal activity recorded in V1. Using a fixed artificial  
265 decision criterion, the decreased responses to targets and distractors with decreasing  
266 ISI results in a significant decrease in the predicted FA rate ( $0^\circ$ : 750 ms vs. 250 ms:  
267  $p < 10^{-4}$ ; Friedman test ( $p < 10^{-4}$ ) with post-hoc Tukey HSD test; **Figure 4e**) and a slight,  
268 but not significant, decrease in the hit rate ( $22.5^\circ$  target:  $p=0.37$ ; Friedman test)  
269 resulting in an increase in measured bias ( $c$  for  $22.5^\circ$  target: 750 ms vs. 250 ms:  
270  $p < 0.005$ ; Friedman test ( $p < 0.005$ ) with post-hoc Tukey HSD test; **Figure 4f**) without a  
271 change in sensitivity ( $d'$  for  $22.5^\circ$  target:  $p=0.26$ ; Friedman test). Thus, the effects of ISI  
272 on behavioral bias are consistent with the effects of ISI on sensory encoding. Thus, we  
273 have demonstrated that both direct optogenetic, and indirect stimulus-dependent,

274 manipulations of sensory encoding affect both behavioral and neuronal measures of  
275 bias.

276

## 277 **Discussion:**

278

279 Signal detection theory is a standard approach for quantifying the sensory and cognitive  
280 contributions to perceptual decision-making. However, we provide both behavioral and  
281 neuronal evidence that measures of bias are sensitive to changes in sensory encoding.  
282 Directly manipulating neuronal excitability in V1 induced predictable changes in  
283 behavioral bias with comparatively little effect on sensitivity in the performance of an  
284 orientation discrimination task. Moreover, by varying either stimulus contrast or  
285 adaptation state, we also observed robust changes in bias. These results clearly  
286 demonstrate that changes in bias are not necessarily due to cognitive mechanisms, and  
287 conversely, that the lack of a change in sensitivity does not preclude effects on sensory  
288 encoding.

289

290 The optogenetic and stimulus manipulations applied in this study altered the quality of  
291 stimulus encoding. These manipulations each either increase or decrease neuronal  
292 responses to both targets and distractors, thereby increasing or decreasing the optimal  
293 criterion. Thus, the coincident change in both hit and FA rate are interpreted in SDT as  
294 a change in measured bias, even in the absence of a change in decision criterion  
295 (**Figure 1a**). Neuronal recordings in V1 confirmed that the optogenetic and stimulus  
296 manipulations shifted the target and distractor response distributions in the same  
297 direction, although not necessarily by the same amount. For instance, we find that V1  
298 excitation increases the response to distractors slightly more than for targets  
299 (Modulation index:  $0^\circ$  vs.  $22.5^\circ$ :  $0.48 \pm 0.05$  vs.  $0.37 \pm 0.06$ ;  $p=0.07$ ,  $n=83$  cells; Wilcoxon  
300 signed rank test), likely due to the contribution of normalization circuits (Carandini and  
301 Heeger, 2012; Histed, 2018). These disproportionate changes in target and distractor  
302 distributions result in a change in both neuronal and behavioral sensitivity (**Figure 2**).

303

304 Importantly, measurements of bias from the neuronal activity clearly demonstrate that  
305 there can be changes in bias without changes in the decision criterion. We recorded  
306 from passively viewing mice to rule out the possibility that feedback from cognitive  
307 structures might influence the sensory responses. Moreover, in these analyses, we set  
308 and fix the decision criterion across conditions. While it is possible that the optogenetic  
309 and stimulus manipulations affect the animals' decision criterion, we think it is unlikely.  
310 First, the optogenetic and stimulus conditions were varied on a presentation-by-  
311 presentation basis such that the animal could not predict the upcoming condition.  
312 Therefore, it is unlikely that the mouse could adjust its decision criterion on these short  
313 time scales. Even if optogenetic manipulations in V1 did change the decision criterion,  
314 the decision criterion would likely remain shifted for the immediately following stimulus  
315 after optogenetic termination within a trial. However we did not observe any changes in  
316 the behavior measures at the current stimulus when its preceding stimulus was  
317 suppressed or excited (c for 22.5°: V1 Stim<sub>N-1</sub> suppression vs. Stim<sub>N-1</sub> control:  $0.9 \pm 0.2$   
318 vs.  $0.8 \pm 0.2$ ,  $p=0.51$ ,  $n=4$  mice; V1 Stim<sub>N-1</sub> excitation vs. Stim<sub>N-1</sub> control:  $1.0 \pm 0.1$  vs.  
319  $0.9 \pm 0.1$ ,  $p=0.31$ ,  $n=4$  mice; paired t-test; **Figure S2**). Second, these manipulations do  
320 not significantly affect lapse rate across conditions (control vs. V1 suppression:  $p=0.13$ ,  
321  $n=4$  mice, paired t-test; control vs. V1 excitation:  $p=0.18$ ,  $n=4$  mice, paired t-test; across  
322 contrasts:  $p=0.32$ ,  $n=5$  mice, one-way anova; across ISIs:  $p=0.97$ ,  $n=11$  mice, one-way  
323 anova).

324  
325 However, if the animal were to compensate for the changes in sensory encoding by  
326 shifting its decision criterion, this could cancel the effects of sensory encoding on bias,  
327 making it seem as though there were no change in bias at all. Therefore, a lack of a  
328 change in bias does not guarantee a stable decision criterion. As we have shown,  
329 changes to sensory encoding that alter the target and distractor distributions in the  
330 same direction are commonplace. For instance, the classic gain-change effects of both  
331 spatial and feature attention on neuronal activity should drive changes in both sensitivity  
332 and bias (Treue and Maunsell, 1996; Treue and Martinez-Trujillo, 1999). In contrast,  
333 changes to sensory encoding that proportionally change target and distractor

334 distributions in opposite directions, such that the optimal criterion is stable, are less  
335 common.

336  
337 Notably, these manipulations are able to induce large shifts in bias in part because of  
338 the strategy that the mouse is using to perform the task (Jin et al., 2018). The circuits  
339 downstream of V1 are monitoring the total firing rates of a population of target-  
340 responsive sensory neurons. When the firing rate of this population exceeds some  
341 threshold, a change is detected. This can explain why increases in contrast, ISI or  
342 excitability of V1 neurons are often mistaken for target orientations and result in  
343 increased hit and FA rates. However, other decoding strategies that compute the  
344 estimated orientation from the population activity, for instance through a likelihood  
345 function, are also sensitive to manipulations of excitability in sensory cortex due to  
346 changes in certainty, and thus may also affect measured bias (Stocker and Simoncelli,  
347 2006).

348  
349 We find that the effects of optogenetic manipulation of neuronal activity in V1 on  
350 neuronal and behavioral bias go in the same direction. However, since we do not know  
351 the quantitative transform between sensory responses and behavior, these data cannot  
352 determine whether all of the changes in behavioral bias can be accounted for by  
353 changes in sensory encoding. Thus, while our optogenetic data is most consistent with  
354 a sensory role for V1, we cannot rule out some cognitive contributions. This reveals that  
355 combining optogenetics and SDT to dissociate the sensory and cognitive contributions  
356 to perceptual decision-making in distinct brain circuits is not straightforward. Realizing  
357 this confound, some groups have designed tasks to support the dissociation of sensory  
358 and cognitive contributions through SDT analyses. One such approach is to take  
359 advantage of the temporal separability between these processes. For instance, studies  
360 normally use pre-stimulus cues to bias the behavioral choice, but by adding a post-  
361 stimulus cue design one can better dissociate the effects of cue on sensory encoding  
362 and response bias (Bang and Rahnev, 2017). Other groups have taken advantage of  
363 clever stimulus design. For instance, using noisy stimulus sets to generate trial-by-trial  
364 variability enables experimenters to use regression-based approaches to measure

365 stimulus sensitivity across conditions, and thereby dissociate of perceptual and  
366 response bias (Wyart et al., 2012; Kloosterman et al., 2018). Together, these  
367 approaches can be combined with optogenetics to determine the extent to which brain  
368 areas and circuits contribute to the various stages of perceptual decision-making.

369

## 370 **Methods:**

371 **Animals.** All animal procedures conformed to standards set forth by the NIH, and were  
372 approved by the IACUC at Duke University. 23 mice (both sexes; 3-24 months old;  
373 singly and group housed (1-4 in a cage) under a regular 12-h light/dark cycle; C57/B6J  
374 (Jackson Labs #000664) was the primary background with up to 50% CBA/CaJ  
375 (Jackson Labs #000654)) were used in this study. *Pvalb-cre* (*tm1(cre)Arbr*, Jackson  
376 Labs #008069; n=15; PV::Cre), *VGAT-ChR2-EYFP* (*Slc32a1-COP4\*H134R/EYFP*,  
377 Jackson Labs #014548; n=2) and *Emx1-IRES-Cre* (*tm1(cre)Krlj*, Jackson Labs #  
378 005628; n=6; EMX1::Cre) were crossed to C57/B6J mice for *in vivo* extracellular  
379 electrophysiology (n=11) and behavior (n=14) experiments. Note two of the mice (one  
380 PV::Cre and one Emx1::Cre) were used in both behavior and recording.

381

382 **Cranial window implant.** Dexamethasone (3.2 mg/kg, s.c.) and Meloxicam (2.5 mg/kg,  
383 s.c.) were administered at least 2 h before surgery. Animals were anesthetized with  
384 ketamine (200 mg/kg, i.p.), xylazine (30 mg/kg, i.p.) and isoflurane (1.2-2% in 100% O<sub>2</sub>).  
385 Using aseptic technique, a headpost was secured using cyanoacrylate glue and C&B  
386 Metabond (Parkell), and a 5 mm craniotomy was made over the left hemisphere (center:  
387 2.8 mm lateral, 0.5 mm anterior to lambda) allowing implantation of a glass window (an  
388 8-mm coverslip bonded to two 5-mm coverslips (Warner no. 1) with refractive index-  
389 matched adhesive (Norland no. 71)) using Metabond.

390 The mice were allowed to recover for one week before habituation to head  
391 restraint. Habituation to head restraint increased in duration from 15 min to >2 h over 1-  
392 2 weeks. During habituation and electrophysiology sessions, mice were head restrained  
393 while either allowed to freely run on a circular disc (InnoWheel, VWR) or rest in a plastic  
394 tube.

395

396 **Visual stimulation.** Visual stimuli were presented either on a 144-Hz (Asus) or 120-Hz  
397 (Samsung) LCD monitor, calibrated with an i1 Display Pro (X-rite), for electrophysiology  
398 and behavior experiments, respectively. The monitor was positioned 21 cm from the  
399 contralateral eye. Circular gabor patches containing static sine-wave gratings alternated  
400 with periods of uniform mean luminance (60 cd/m<sup>2</sup>). Visual stimuli for electrophysiology  
401 and behavior experiments were controlled with MWorks (<http://mworks-project.org>).

402 Three visual stimulus protocols were used for electrophysiology experiments in  
403 which we varied: 1) blue light (473 nm) stimulation of single stimulus presentations  
404 (each trial targeted with equal probability either: the distractor two stimuli before the  
405 target, the distractor before the target, the target, or no stimulation) and target  
406 orientations (22.5°, 45° and 90°; n=3 mice for each excitation and inhibition; **Figure 1-**  
407 **2**); 2) stimulus contrast (30, 50 and 70%) and target orientation (22.5° and 90°; n=5  
408 mice **Figure 3**); and 3) number of distractor presentations (two to nine), inter-stimulus  
409 interval (ISI; 250, 500 and 750 ms) and target orientation (22.5°, 45° and 90°; n=4 mice;  
410 **Figure 4**). In the case that the stimulus properties were not varied, the default was six  
411 distractor presentations, a 250 ms ISI, 100% contrast. In order to maximize the contrast-  
412 dependence of neuronal responses, Protocol 2 used a 20° diameter gabor at a spatial  
413 frequency (SF) of 0.16 cyc/deg, to limit the contribution of increasing surround  
414 suppression with increasing contrast. Protocols 1 and 3 used a 30° gabor at a SF of 0.1  
415 cyc/deg. All protocols had an inter-trial interval (ITI) of 4 s. All stimulus conditions that  
416 were varied on a trial-by-trial or presentation-by-presentation basis were randomly  
417 interleaved.

418  
419 **Retinotopic mapping.** Retinotopic maps generated from intrinsic autofluorescence or  
420 cortical reflectance (for *VGAT-ChR2-EYFP* mice). For intrinsic autofluorescence, the  
421 brain was illuminated with blue light (473 nm LED (Thorlabs) or a white light source  
422 (EXFO) with a 462 ± 15 nm band pass filter (Edmund Optics)), and emitted light was  
423 measured through a green and red filter (500 nm longpass); for cortical reflectance, the  
424 brain was illuminated with orange light (530 nm LED (Thorlabs)), and all of the reflected  
425 light was collected. Images were collected using a CCD camera (Rolera EMC-2,  
426 Qimaging) at 2 Hz through a 5x air immersion objective (0.14 numerical aperture (NA),

427 Mitutoyo), using Micromanager acquisition software (NIH). Stimuli were presented at 4-  
428 6 positions (drifting, sinusoidal gratings at 2 Hz) for 10 s, with 10 s of mean luminance  
429 preceding each trial. Images were analyzed in ImageJ (NIH) to measure changes in  
430 fluorescence (dF/F; with F being the average of all frames) to identify primary visual  
431 cortex (V1) and the higher visual areas. Vascular landmarks were used to identify  
432 targeted sites (V1) for electrophysiology and optogenetics experiments.

433  
434 **Viral injection.** We targeted V1 in PV::Cre mice (n=4) for expression of  
435 Channelrhodopsin2 (ChR2) and in Emx1::Cre mice (n=6) for expression of Chronos.  
436 Dexamethasone (3.2 mg/kg, s.c.) was administered at least 2 h before surgery and  
437 animals were anesthetized with isoflurane (1.2-2% in 100% O<sub>2</sub>). The coverslip was  
438 sterilized with 70% ethanol and the cranial window removed. A glass micropipette was  
439 filled with virus (AAV5.EF1.dFloxed.hChR2.YFP (UPenn CS0384) or  
440 AAV9.hSyn.FLEX.rc.Chronos.GFP (Addgene 59056)), mounted on a Hamilton syringe,  
441 and lowered into the brain. 50 nL of virus were injected at 250 and 500  $\mu$ m below the  
442 pia (30 nL/min); the pipette was left in the brain for an additional 10 minutes to allow the  
443 virus to infuse into the tissue. Following injection, a new coverslip was sealed in place,  
444 and an optical cannula (400  $\mu$ m diameter; Doric Lenses) was attached to the cranial  
445 window above the injection site. Optogenetic behavioral experiments and  
446 electrophysiology experiments were conducted at least two weeks following injection to  
447 allow for sufficient expression.

448  
449 **Extracellular electrophysiology.** Electrophysiological signals were acquired with a 32-  
450 site polytrode acute probe (either A4x8-5mm-100-400-177-A32 (4 shanks, 8 site/shank  
451 at 100  $\mu$ m spacing) or A1x32-Poly2-5mm-50s-177-A32, (1 shank, 32 sites, 25  $\mu$ m  
452 spacing), NeuroNexus) through an A32-OM32 adaptor connected to a Cereplex digital  
453 headstage (Blackrock Microsystems). Unfiltered signals were digitized at 30 kHz at the  
454 headstage and recorded by a Cerebus multichannel data acquisition system (Blackrock  
455 Microsystems). Visual stimulation synchronization signals were also acquired through  
456 the same system via a photodiode directly monitoring LCD output.

457           On the day of recording, the cranial window was removed, and a small durotomy  
458 performed to allow insertion of the electrode into V1. A ground wire was connected via a  
459 gold pin cemented in a burrhole in the anterior portion of the brain. The probe was  
460 slowly lowered into the brain (over the course of 15 min with travel length of around 800  
461  $\mu\text{m}$ ) until the most superficial recording site was in the brain and allowed to stabilize for  
462 45 - 60 min before beginning recordings. For optogenetic stimulation in protocol 1, the  
463 optic fiber was held in place via an articulated arm (Flexbar, SKU: 14830) to allow light  
464 delivery (473 nm LED, Thorlabs) to the recording site. For V1 suppression, the mean  
465 light power was  $0.28 \pm 0.02$  mW (range: 0.1-0.4 mW); and for V1 excitation, the mean  
466 light power was  $0.05 \pm 0.003$  mW (range: 0.03-0.06 mW), matching the ranges that were  
467 used in the behavioral tests.

468           Of the 11 mice that were used for extracellular electrophysiology, 3 were  
469 previously trained in the orientation discrimination task, 3 were trained in a contrast  
470 discrimination task, and 5 were naïve.

471  
472 **Behavioral task.** Animals were water scheduled and trained to discriminate orientations  
473 in visual stimuli by manipulating a lever. The behavior training and testing occurred  
474 during the light cycle. We first trained mice to detect full-field,  $90^\circ$  orientation difference  
475 (target) from a static grating. Most mice ( $n=12$ ) were trained with a  $0^\circ$  distractor;  
476 however, 2 mice were trained with a  $45^\circ$  distractor. On the initial days of training, mice  
477 were rewarded for holding the lever for at least 400 ms (required hold time) but no more  
478 than 20 s (maximum hold time). At the end of the required hold time, the grating  
479 changed orientation and remained horizontal until the mouse released the lever (or the  
480 maximum hold time expired). Typically, within two weeks of training, the mice began  
481 releasing the lever as soon as the target orientation appears. Once the animals began  
482 reliably responding to the target orientation, we added a random delay between lever  
483 press and target stimulus to discourage adoption of a timing strategy. Over the course  
484 of the next few weeks, the task was made harder by (in roughly chronological order): 1)  
485 increasing the random delay, 2) decreasing the target stimulus duration and reaction  
486 time window, 3) removing the stimulus during the ITI, 4) shrinking and moving the  
487 stimuli to more eccentric positions, 5) adding a mean-luminance ISI to mask the motion



488 signal in the orientation change, and finally 6) introducing hard targets (range: 9-90°).  
489 Delays after errors were also added to discourage lapses and early releases.

490 In the final form of the task, each trial was initiated when the ITI (3s) had elapsed  
491 and the mouse had pressed the lever. Trial start triggered the presentation of a 100 ms  
492 static sinusoidal, gabor patch (30° in diameter, SF of 0.1 cycle/deg, positioned at an  
493 eccentricity of 30° - 40° in azimuth and 0° - 10° in elevation) followed by an ISI randomly  
494 selected on a presentation-by-presentation basis (250, 500 or 750 ms). For a subset of  
495 mice (n=5, **Figure 3**), the contrast of each presentation was also randomized  
496 (Michelson contrast: 30%, 50% and 70%); in these experiments the stimulus size was  
497 reduced to 20° and the SF increased to 0.16 cycle/deg, at 5°-15° in azimuth and 10° in  
498 elevation to 1) reduce the surround suppression and 2) compensate for the difficulty  
499 induced by low contrast and small size of the stimuli. The target orientation occurred  
500 with a random delay (flat distribution) after the first two presentations on each trial and  
501 the target orientation was randomly selected from a fixed set of values around each  
502 animal's threshold. Mice received water reward if they released the lever within 100-650  
503 ms (sometimes extended to 1000 ms) after a target occurred. However, for calculating  
504 hit and false alarm (FA) rate, we use a narrower reaction window (200-550 ms) to  
505 ensure that the majority of the releases in this window are due to stimulus driven  
506 responses and have independent reaction windows for adjacent stimuli with short ISIs.

507 For optogenetic stimulation (**Figure 1-2**), we delivered blue light to the brain  
508 through the cannula from a 473 nm LED (Thorlabs) or a 450 nm laser (Optoengine) and  
509 calibrated the total light intensity at the entrance to the cannula. The light power is  
510 titrated so that it does not induce significant changes in the lapse rate for both V1  
511 suppression (lapse rate: control vs. V1 suppression:  $0.08 \pm 0.01$  vs.  $0.10 \pm 0.02$ ;  $p=0.13$ ,  
512  $n=4$  mice, paired t-test) and V1 excitation (control vs. V1 excitation:  $0.12 \pm 0.06$  vs.  
513  $0.06 \pm 0.03$ ;  $p=0.18$ ,  $n=4$  mice, paired t-test). For V1 suppression, the mean light power  
514 was  $0.27 \pm 0.07$  mW (range: 0.07-0.4 mW); and for V1 excitation, the mean light power  
515 was  $0.06 \pm 0.02$  mW (range: 0.02-0.1 mW, **Figure 2a-b**). On each trial, a single stimulus  
516 (either the distractor two stimuli before the target, the distractor before the target, the  
517 target, or the distractor after the target) was targeted with equal probability. The light  
518 was turned on around 30ms before the time of visual presentation onset for the duration

519 of the stimulus (100 ms). Behavioral control was done with MWorks, and custom  
520 software in MATLAB (MathWorks).

521 Notably, there are overlapping animals in dataset of the optogenetic (**Figure 1-2**),  
522 contrast (**Figure 3**) and ISI manipulations (**Figure 4**). Below, we provided a table (**Table**  
523 **1**) that describes the mice overlap and difference in time in collecting these datasets.  
524 Numbers (1-3) indicate the time sequence of the tasks that were tested and data was  
525 collected for each mouse, while 0 reflects no training on that task. Four mice were  
526 trained in a single task, 9 mice were trained on two tasks thus belonged to two datasets,  
527 and only 1 mouse was included in all datasets.

528

529 **Table 1| Mice overlap and timeline among three datasets**

| Mouse ID# | Genotype  | Optogenetics | Contrast | ISI |
|-----------|-----------|--------------|----------|-----|
| a         | EMX1::Cre | 1            | 0        | 0   |
| b         | EMX1::Cre | 1            | 2        | 0   |
| c         | VGAT-ChR2 | 1            | 2        | 0   |
| d         | EMX1::Cre | 2            | 0        | 1   |
| e         | EMX1::Cre | 2            | 0        | 1   |
| f         | PV::Cre   | 2            | 0        | 1   |
| g         | VGAT-ChR2 | 2            | 0        | 1   |
| h         | PV::Cre   | 3            | 2        | 1   |
| i         | PV::Cre   | 0            | 2        | 1   |
| j         | PV::Cre   | 0            | 2        | 1   |
| k         | PV::Cre   | 0            | 2        | 1   |
| l         | PV::Cre   | 0            | 0        | 1   |
| m         | PV::Cre   | 0            | 0        | 1   |
| n         | PV::Cre   | 0            | 0        | 1   |

530

### 531 **Data processing**

532 *Electrophysiology processing and analysis.* Individual single units were isolated using  
533 the SpyKing CIRCUS package (<http://spyking-circus.readthedocs.io/en/latest/>). Raw  
534 data were first high pass filtered (> 500 Hz) and spikes were detected when a filtered  
535 voltage trace crossed threshold (9-13 median absolute deviations computed on each

536 channel). A combination of density-based clustering and template matching algorithms  
537 were used to automatically cluster the spikes. The resulting clusters were then  
538 inspected and adjusted manually using a MATLAB GUI. Clusters with refractory period  
539 violations ( $< 2$  ms,  $>1\%$  violation) in the auto-correlogram and that were not stable  
540 across the whole recording session were discarded from the dataset. Clusters were  
541 combined if they met each of three criteria by inspection: 1) similar waveforms; 2)  
542 coordinated refractory periods in the cross-correlogram; 3) similar inter-spike interval  
543 distribution shape. Unit position with respect to the recording sites was calculated as the  
544 average of all site positions weighted by the waveform amplitude of each site. For V1-  
545 suppression or excitation experiments, we also quantified the similarity of the  
546 waveforms between control and optogenetic conditions using correlation coefficient ( $r$ )  
547 values. Because for majority of the cells, V1 suppression strongly reduce firing rate  
548 (**Figure S1c**) rendering few or even no spikes for analyzing waveforms, we extended  
549 the window starting from 200 ms before visual onset, end with 250 ms after visual  
550 offset. Signal and noise ratio of the trough value of the waveform shape was calculated  
551 as mean divided by SD across spikes. All of the subsequent analysis was performed in  
552 MATLAB.

553 Visually-evoked responses of each unit in V1 were measured based on average  
554 peri-stimulus time histograms (PSTHs, bin size: 20 ms) over repeated presentations  
555 ( $>25$  trials) of the same stimulus. Response amplitudes were measured on a trial-by-trial  
556 basis: by subtracting the firing rate at the time of the visual stimulus onset from the  
557 value at the peak of the average PSTH within a window of 0-100 ms after the visual  
558 onset. However, in the case of V1 excitation, responses were measured by subtracting  
559 the baseline firing rate (value at visual onset, bin 0 ms, multiplied by 6) from the number  
560 of spikes during the visual presentation window (0-100ms, 6 bins). This is because the  
561 peak response latencies after V1 excitation were often shorter than the latencies of the  
562 visual responses in the control condition. “Responsive cells” were chosen as having  
563 statistically significant visually-evoked responses using a paired t-test to compare  
564 baseline responses (averaged over 0-100 ms before the visual onset) with visually-  
565 evoked responses (averaged over 0-100 ms after the visual onset; this analysis window  
566 excluded off-responsive units from analysis). For all protocols, we included cells that

567 were significantly driven by either the first distractor stimulus or any of the target  
568 orientations. For V1 suppression experiments, we excluded cells that were significantly  
569 driven by the light stimulation. For protocol 2, this test was only performed for the  
570 highest contrast stimuli. Thus, we included 70/110 cells for V1 suppression; and 83/109  
571 cells for V1 excitation; for protocol 2, we included 92/151 cells and for protocol 3, 74/100  
572 cells were included; Modulation index (MI) of V1 excitation on neuronal responses (R) is  
573 calculated as:

$$MI = \frac{R_{excite} - R_{control}}{|R_{excite}| + |R_{control}|}$$

574 For calculation of predicted hit rate and FA rate: the distribution of single trial  
575 responses to the 22.5° target was compared to the distribution of responses to the  
576 distractor (0°, 3<sup>rd</sup>-6<sup>th</sup> stimulus). For protocol 1 - V1 suppression, the artificial decision  
577 criterion for each cell was fixed as the mean of the responses to the suppressed  
578 distractor and the target in control. For protocol 1 - V1 excitation, the artificial decision  
579 criterion for each cell was fixed as the mean of the responses to the distractor in control  
580 conditions and the excited target. For protocol 2, the artificial decision criterion was fixed  
581 across all contrasts for each cell as the mean of the responses to the lowest contrast  
582 distractor (0°-30%) and the highest contrast target (22.5°-70%). For protocol 3, the  
583 artificial decision criterion was fixed across all ISIs for each cell as the mean of the  
584 responses to the most adapted distractor (0°-250ms ISI) and the most recovered target  
585 (22.5°-750 ms ISI). Thus, hit rate or FA rate across all conditions (either contrasts, ISIs  
586 or V1 suppression/excitation) were calculated as percentage of trials of the target or  
587 distractor responses that is higher than the artificial decision criterion, respectively.

588 Signal detection theory (Green and Swets, 1966) was applied to measure  
589 neuronal sensitivity ( $d'$ ) and bias ( $c$ ). For the extreme values of 0 and 1 for the predicted  
590 hit rate and FA rate, it is adjusted as follows to allow calculate sensitivity ( $d'$ ) and bias  
591 ( $c$ ): rates of 0 was replaced with  $0.5/n$ , and rates of 1 was replaced with  $(n-0.5)/n$ , where  
592  $n$  is the number of target or distractor trials (Macmillan and Kaplan, 1985; Stanislaw and  
593 Todorov, 1999).  $d'$  and  $c$  were then calculated as follows:

$$d' = Z(\text{hit rate}) - Z(\text{FA rate})$$
$$c = -\frac{Z(\text{hit rate}) + Z(\text{FA rate})}{2}$$

594 where Z is the inverse of the cumulative distribution function of the normal Gaussian  
595 distribution. To avoid confounds of directionality (since an increase in a positive d' and a  
596 decrease in a negative d' are both increases in sensitivity), only cells that had a positive  
597 d' in the control condition (V1 suppression- 47/70; V1 excitation- 45/83), or across  
598 contrasts (19/92) and ISIs (21/74 cells) were included.

599  
600 *Behavior processing and analysis.*

601 All behavioral processing and analysis were performed in MATLAB. All trials were  
602 categorized as either an early release, hit, or miss based on the time of release relative  
603 to target onset: responses occurring earlier than 100 ms after the target stimulus were  
604 considered early releases; responses occurring between 200 and 550 ms after the  
605 target were considered hits; failures to respond before 550 ms after the target were  
606 considered misses. Behavioral sessions were manually cropped to include only stable  
607 periods of performance and were further selected based on the following criteria: for  
608 protocol 1: 1) at least 40% of trials were hits; and 2) less than 50% of trials were early  
609 releases; for protocols 2&3: 1) at least 50% of trials were hits; and 2) less than 35% of  
610 trials were early releases. Based on these criteria, the data in **Figure 2 - V1**  
611 **suppression** included  $16 \pm 3$  (range: 8-19) sessions for each mouse with  $4793 \pm 706$   
612 trials (range: 3408-6695); **Figure 2 - V1 excitation** included  $29 \pm 13$  (range: 3-58)  
613 sessions for each mouse with  $8416 \pm 3981$  trials (range: 1551-18102); the data in  
614 **Figure 3** included  $34 \pm 13$  (range: 11-75) sessions for each mouse with  $8975 \pm 3519$   
615 trials (range: 1017-23181), respectively; the data in **Figure 4** included  $17 \pm 3$  sessions  
616 (range: 5-46) for each mouse with an average of  $6348 \pm 815$  trials per mouse (range:  
617 2593-11857).

618 Hit rate was computed from the number of hits and misses for each stimulus  
619 type:

$$Hit\ rate = \frac{hit}{hit + miss}$$

620 All distractor stimulus presentations were categorized as either a CR or a FA:  
621 responses occurring between 200 and 550 ms after a distractor stimulus were  
622 considered FAs; presentations where the mouse held the lever for at least 550 ms after

623 the distractor stimulus were considered CRs. FA rate was computed from the total  
624 number of FAs and CRs in the session:

$$FA\ rate = \frac{FA}{FA + CR}$$

625 Hit and FA rate were used calculate behavioral  $d'$  and  $c$  the same equations as  
626 were used to calculate  $d'$  and  $c$  for the neuronal data. Since the detection threshold  
627 varies across mice and not all the mice have been sampled at exactly the same  
628 orientations such as  $22.5^\circ$ , the hit rate for  $22.5^\circ$  is extrapolated based on a Weibull  
629 function fitted from the psychometric curve for each mouse.

630

### 631 **Statistical analysis.**

632 Data were tested for normality using a Lilliefors test. While behavioral measures were  
633 normally distributed, electrophysiological measures of spike rates were not. Therefore,  
634 behavioral data were compared with either a t-test or ANOVA with post hoc Tukey HSD  
635 test for datasets with two and multiple groups, respectively. However, for the neuronal  
636 activity we used only non-parametric tests (Wilcoxon signed rank test and Friedman test  
637 with post hoc Tukey HSD test to compare two and multiple groups, respectively).  
638 Sample sizes were not predetermined by statistical methods, but are similar to other  
639 studies. Data collection and analysis were not performed blind to experimental  
640 conditions, but all visual presentation conditions in extracellular recording and behavior  
641 experiments are randomized.

642

### 643 **Data and code availability.**

644 All relevant data and code are available from the corresponding author upon reasonable  
645 request.

646

### 647 **Acknowledgements**

648 We thank B. Gincley and J. Sims for assistance with behavioral training; K. Leonard, M.  
649 Fowler, J. Isaac and K. Murgas for surgical assistance; Z. Xu for assistance with  
650 software development; S. Lisberger, G. Field, C. Hull and members of the Hull and  
651 Glickfeld labs for helpful discussions and comments on the manuscript. This work was

652 supported by an NIH Director's New Innovator Award (DP2-EY025439), the Pew  
653 Biomedical Trusts, and the Alfred P. Sloan Foundation (L.L.G).

654

### 655 **Author Contributions**

656 M.J. and L.L.G. designed the experiments. M.J. collected and analyzed the  
657 electrophysiology and behavior data. M.J. and L.L.G wrote the manuscript.

658

### 659 **References**

660 Bang JW, Rahnev D (2017) Stimulus expectation alters decision criterion but not  
661 sensory signal in perceptual decision making. *Sci Rep* 7:1–12.

662 Bashinski HS, Bacharach VR (1980) Enhancement of perceptual sensitivity as the result  
663 of selectively attending to spatial locations. *Percept Psychophys* 28:241–248.

664 Bennett C, Arroyo S, Hestrin S (2013) Subthreshold mechanisms underlying state-  
665 dependent modulation of visual responses. *Neuron* 80:350–357.

666 Carandini M, Churchland AK (2013) Probing perceptual decisions in rodents. *Nat*  
667 *Neurosci* 16:824–831.

668 Carandini M, Heeger DJ (2012) Normalization as a canonical neural computation. *Nat*  
669 *Rev Neurosci* 13:51–62.

670 Clifford CWG, Webster MA, Stanley GB, Stocker AA, Kohn A, Sharpee TO, Schwartz O  
671 (2007) Visual adaptation: Neural, psychological and computational aspects. *Vision*  
672 *Res* 47:3125–3131.

673 Crapse TB, Lau H, Basso MA (2017) A Role for the Superior Colliculus in Decision  
674 Criteria. *Neuron* 97:181–194.e6.

675 de Gee JW, Colizoli O, Kloosterman NA, Knapen T, Nieuwenhuis S, Donner TH (2017)  
676 Dynamic modulation of decision biases by brainstem arousal systems. *Elife* 6.

677 Dragoi V, Sharma J, Sur M (2000) Adaptation-Induced Plasticity of Orientation Tuning in  
678 Adult Visual Cortex. *Neuron* 28:287–298.

679 Gao E, DeAngelis GC, Burkhalter A (2010) Parallel input channels to mouse primary  
680 visual cortex. *J Neurosci* 30:5912–5926.

681 Gold JI, Shadlen MN (2007) The Neural Basis of Decision Making. *Annu Rev Neurosci*  
682 30:535–574.

- 683 Green DM, Swets J (1966) Signal detection theory and psychophysics. Wiley.
- 684 Grove PM, Ashton J, Kawachi Y, Sakurai K (2012) Auditory transients do not affect  
685 visual sensitivity in discriminating between objective streaming and bouncing  
686 events. *J Vis* 12:5–5.
- 687 Hanks TD, Summerfield C (2017) Perceptual Decision Making in Rodents, Monkeys,  
688 and Humans. *Neuron* 93:15–31.
- 689 Histed MH (2018) Feedforward Inhibition Allows Input Summation to Vary in Recurrent  
690 Cortical Networks. *Eneuro* 5:ENEURO.0356-17.2018.
- 691 Iemi L, Chaumon M, Crouzet SM, Busch NA (2017) Spontaneous Neural Oscillations  
692 Bias Perception by Modulating Baseline Excitability. *J Neurosci* 37:807–819.
- 693 Jin M, Beck JM, Glickfeld LL (2018) Neuronal adaptation reveals a suboptimal decoding  
694 of orientation tuned populations in the mouse visual cortex. *bioRxiv*:433722.
- 695 Jones PR, Moore DR, Amitay S (2015) The role of response bias in perceptual learning.  
696 *J Exp Psychol Learn Mem Cogn* 2015:1456–1470.
- 697 Jurjut O, Georgieva P, Busse L, Katzner S (2016) Learning enhances sensory  
698 processing in mouse V1 before improving behavior. *bioRxiv* 37:1–29.
- 699 Kloosterman NA, de Gee JW, Werkle-Bergner M, Lindenberger U, Garrett DD,  
700 Fahrenfort JJ (2018) Humans strategically shift decision bias by flexibly adjusting  
701 sensory evidence accumulation in visual cortex. *bioRxiv*.
- 702 Kok P, Brouwer GJ, van Gerven MAJ, de Lange FP (2013) Prior Expectations Bias  
703 Sensory Representations in Visual Cortex. *J Neurosci* 33:16275–16284.
- 704 Luo TZ, Maunsell JHR (2015) Neuronal Modulations in Visual Cortex Are Associated  
705 with Only One of Multiple Components of Attention. *Neuron* 86:1182–1188.
- 706 Luo TZ, Maunsell JHR (2018) Attentional Changes in Either Criterion or Sensitivity Are  
707 Associated with Robust Modulations in Lateral Prefrontal Cortex. *Neuron* 97:1382–  
708 1393.e7.
- 709 Macmillan NA, Kaplan HL (1985) Detection theory analysis of group data: Estimating  
710 sensitivity from average hit and false-alarm rates. *Psychol Bull* 98:185–199.
- 711 McDonald JJ, Teder-Saälejärvi WA, Hillyard SA (2000) Involuntary orienting to sound  
712 improves visual perception. *Nature* 407:906–908.
- 713 Müller JR, Metha AB, Krauskopf J, Lennie P (1999) Rapid adaptation in visual cortex to



- 714 the structure of images. *Science* 285:1405–1408.
- 715 Ni AM, Ruff DA, Alberts JJ, Symmonds J, Cohen MR (2017) Learning and attention  
716 reveal a general relationship between neuronal variability and perception. *bioRxiv*  
717 465:1–28.
- 718 Pinto L, Goard MJ, Estandian D, Xu M, Kwan AC, Lee SH, Harrison TC, Feng G, Dan Y  
719 (2013) Fast modulation of visual perception by basal forebrain cholinergic neurons.  
720 *Nat Neurosci* 16:1857–1863.
- 721 Romo R, de Lafuente V (2013) Conversion of sensory signals into perceptual decisions.  
722 *Prog Neurobiol* 103:41–75.
- 723 Stanislaw H, Todorov N (1999) Calculation of signal detection theory measures. *Behav*  
724 *Res Methods Instrum Comput* 31:137–149.
- 725 Stocker AA, Simoncelli EP (2006) Noise characteristics and prior expectations in human  
726 visual speed perception. *Nat Neurosci* 9:578–585.
- 727 Treue S, Martinez-Trujillo JC (1999) Feature-based attention influences motion  
728 processing gain in macaque visual cortex. *Nature* 399:575–579.
- 729 Treue S, Maunsell JHR (1996) Attentional modulation of visual motion processing in  
730 cortical areas MT and MST. *Nature* 382:539–541.
- 731 van Vugt B, Dagnino B, Vartak D, Safaai H, Panzeri S, Dehaene S, Roelfsema PR  
732 (2018) The threshold for conscious report: Signal loss and response bias in visual  
733 and frontal cortex. *Science* (80- ) 7186.
- 734 Vintch B, Gardner JL (2014) Cortical Correlates of Human Motion Perception Biases. *J*  
735 *Neurosci* 34:2592–2604.
- 736 White CN, Mumford JA, Poldrack RA (2012) Perceptual Criteria in the Human Brain. *J*  
737 *Neurosci* 32:16716–16724.
- 738 Witt JK, Taylor JET, Sugovic M, Wixted JT (2015) Signal detection measures cannot  
739 distinguish perceptual biases from response biases. *Perception* 44:289–300.
- 740 Wyart V, Nobre AC, Summerfield C (2012) Dissociable prior influences of signal  
741 probability and relevance on visual contrast sensitivity. *Proc Natl Acad Sci*  
742 109:3593–3598.

743

744 **Figure Legends**

745 **Figure 1 - Optogenetically suppressing or exciting V1 decreases or increases**  
746 **both signal and noise distributions in an orientation discrimination task.**

747 **(a)** Schematic of effect of shifting signal and noise distributions on bias measured using  
748 signal detection theory. Top: distributions of target (22.5°, solid black) and distractor (0°,  
749 solid gray) responses. Note that bias ( $c$ ) is measured as the distance between the  
750 actual (black vertical line) and optimal ( $c=0$ , gray vertical line) criterion. Bottom:  
751 manipulations that decrease both the target and distractor distributions shift the optimal  
752 criterion to the left, and therefore result in an increase in bias. **(b)** Schematic of behavior  
753 setup and trial progression. Blue light is turned on for a single target or distractor  
754 presentation on each trial. V1 suppression (blue) and excitation (red) is achieved via  
755 optogenetically driving PV+ or VGAT+ neurons and Emx1+ neurons respectively. **(c)** Hit  
756 rate and FA rate (inset) for control (black) and V1 suppression (blue, left) or excitation  
757 (red, right) for one example mouse each. Hit rates are fit with a Weibull function; vertical  
758 dotted lines are threshold, error is 95% confidence interval. **(d)** Schematic of  
759 extracellular recording setup. Stimuli are presented as in **b**. **(e)** Distributions of spikes  
760 summed across a simultaneously recorded population in response to distractor (0°,  
761 open bars) and target (22.5°, filled bars) stimuli on control trials (black) and during V1  
762 suppression (blue,  $n=17$  cells, left) or excitation (red,  $n=16$  cells, right) for one example  
763 experiment each. Triangles show the mean of the distribution.

764

765

766 **Figure S1 – related to Figure 1 - Optogenetically suppressing or exciting V1**  
767 **decreases or increases neuronal responses to both targets and distractors.**

768 **(a)** Left: an example cell's responses to 22.5° target (top) and 0° distractor (bottom) for  
769 control (black) and V1 suppression (blue). Shaded areas are SEM across trials. Right:  
770 mean waveform shapes for control and V1 suppression for the same cell in the left.  
771 Shaded areas are SD across spikes. Correlation coefficient ( $r$ ) is shown to reveal the  
772 similarity in the waveform shapes between control and V1 suppression. Signal-to-noise  
773 ratio (SNR, mean/SD) of the trough value of the waveform is also shown. **(b)** Histogram  
774 of the correlation coefficient ( $r$ , top) and SNR values across all the cells ( $n=70$  cells). **(c)**  
775 Comparison of neuronal responses (FR in Hz) to the 22.5° target (left) and 0° distractor

776 (right) between control and V1 suppression (blue) on the current stimulus ( $\text{Stim}_N$ ). Light  
777 colors are individual cells and dark colors are the mean of the populations. Error bars  
778 are SEM across 70 cells (3 mice). **(d)** Comparison of neuronal responses to the 22.5°  
779 target (left) and 0° distractor (right) on  $\text{Stim}_N$  when the previous stimulus ( $\text{Stim}_{N-1}$ ) was  
780 suppressed vs. control. **(e-h)** Same as **a-d**, for V1 excitation (red, n=83 cells, 3 mice).

781  
782  
783 **Figure 2 - Suppressing or exciting V1 increases or decreases behavioral and**  
784 **neuronal bias.**

785 **(a)** Comparison of the hit (22.5°, left) and FA rate (0°, right) between control and V1  
786 suppression (blue, n=4 mice) or excitation (red, n=4 mice). Light colors are individual  
787 mice and dark colors are the mean of the population. Error bars are SEM across mice.  
788 **(b)** Same as **a**, for bias (left) and sensitivity (right) at 22.5°. **(c)** Same as **a**, for predicted  
789 hit (22.5°, left) and FA rate (0°, right) from neuronal responses using a fixed criterion for  
790 each cell (see Methods). **(d)** Predicted bias (left) and sensitivity (right) using the  
791 predicted hit and FA rate in **c**. Extreme values of hit and FA rate were corrected (see  
792 Methods). Error bars are SEM across cells (V1 suppression-blue: n=47 cells, 3 mice; V1  
793 excitation-red, n=45 cells, 3 mice).

794  
795  
796 **Figure S2 – related to Figure 2 - Lack of effects of  $\text{Stim}_{N-1}$  suppression or**  
797 **excitation on behavior measures at  $\text{Stim}_N$ .**

798 **(a)** Comparison of hit rate (22.5°, left) and FA rate (0°, right) on  $\text{Stim}_N$  when the previous  
799 stimulus ( $\text{Stim}_{N-1}$ ) was suppressed (blue) vs. control. Light colors are individual mice and  
800 dark colors are the mean of the populations. Error bars are SEM across mice (n=4  
801 mice). **(b)** Same as **a**, for bias (left) and sensitivity (right) measures for 22.5° target. **(c-**  
802 **d)** Same as **a-b**, for V1 excitation (red, n=4 mice).

803  
804  
805 **Figure 3 - Decreasing stimulus contrast decreases both hit and FA rate and**  
806 **increases behavioral and neuronal bias.**

807 **(a)** Left: schematic of behavioral setup. Stimulus contrast is varied (30% (light gray),  
808 50% (dark gray) or 70% (black)) on each stimulus presentation. Right: hit rate and FA  
809 rate (inset) for each contrast for an example mouse. Hit rates are fit with a Weibull  
810 function; vertical dotted lines are threshold, error is 95% confidence interval. **(b)**  
811 Comparison of hit (left, 22.5° target) and FA rate (right, 0° distractor) between two  
812 contrasts (70% vs 30%). Gray circles are individual mice and black circle is the mean of  
813 the population. Error bars are SEM across 5 mice. **(c)** Same as **b**, for bias (left) and  
814 sensitivity (right) at 22.5°. **(d)** Left: schematic of extracellular recording setup. Right:  
815 response distributions to distractor (0°, open bars) and target (22.5°, filled bars) stimuli  
816 of 30% (light gray) and 70% (black) contrast in an example cell. Triangles are the mean  
817 of the distribution. The criterion (vertical red line; see Methods) was determined for each  
818 cell and used to predict neuronal hit and false alarm rates for all contrasts. **(e-f)** Same  
819 as **b-c**, for predicted **(e)** hit and FA rate and **(f)** bias and sensitivity from the neuronal  
820 data (n = 19 cells, 4 mice).

821

822

823 **Figure S3 - related to Figure 3 - Reducing stimulus contrast reduces neuronal**  
824 **responses to both targets and distractors.**

825 **(a)** Comparison of neuronal responses (FR in Hz) to the 22.5° target between 30% and  
826 70% contrasts. Gray circles are individual cells and black circle is the mean of the  
827 population. Error bars are SEM across 92 cells (4 mice). **(b)** Same as **a**, for responses  
828 to the 0° distractor.

829

830

831 **Figure 4 - Adaptation decreases both hit and FA rate and increases behavioral**  
832 **and neuronal bias.**

833 **(a)** Left: schematic of behavioral setup. Inter-stimulus interval (ISI) is varied (250 ms  
834 (light gray), 500 ms (dark gray) or 750 ms (black)) on each stimulus presentation. Right:  
835 hit rate and FA rate (inset) for each ISI for an example mouse. Hit rates are fit with a  
836 Weibull function; vertical dotted lines are threshold, error is 95% confidence interval. **(b)**  
837 Comparison of hit (left, 22.5° target) and FA rate (right, 0° distractor) between two ISIs

838 (750 vs. 250 ms). Gray circles are individual mice and black circle is the mean of the  
839 population. Error bars are SEM across 11 mice. **(c)** Same as **b**, for bias (left) and  
840 sensitivity (right) at 22.5°. **(d)** Left: schematic of extracellular recording setup. Right:  
841 response distributions to distractor (0°, open bars) and target (22.5°, filled bars) stimuli  
842 following 250 (gray) or 750 ms (black) ISI for an example cell. Triangles show the mean  
843 of the distribution. The criterion (vertical red line; see Methods) was determined for each  
844 cell and used to predict neuronal hit and false alarm rates for all ISIs. **(e-f)** Same as **b-c**,  
845 for predicted **(e)** hit and FA rate and **(f)** bias and sensitivity from the neuronal data (n =  
846 21 cells, 4 mice).

847

848

849 **Figure S4 - related to Figure 4 - Adaptation reduces neuronal responses to both**  
850 **targets and distractors.**

851 **(a)** Comparison of neuronal responses (FR in Hz) to the 22.5° target after 750 or 250  
852 ms ISIs. Gray circles are individual cells and black circle is the mean of the population.  
853 Error bars are SEM across 74 cells (4 mice). **(b)** Same as **a**, for responses to the 0°  
854 distractor.

## Figure 1

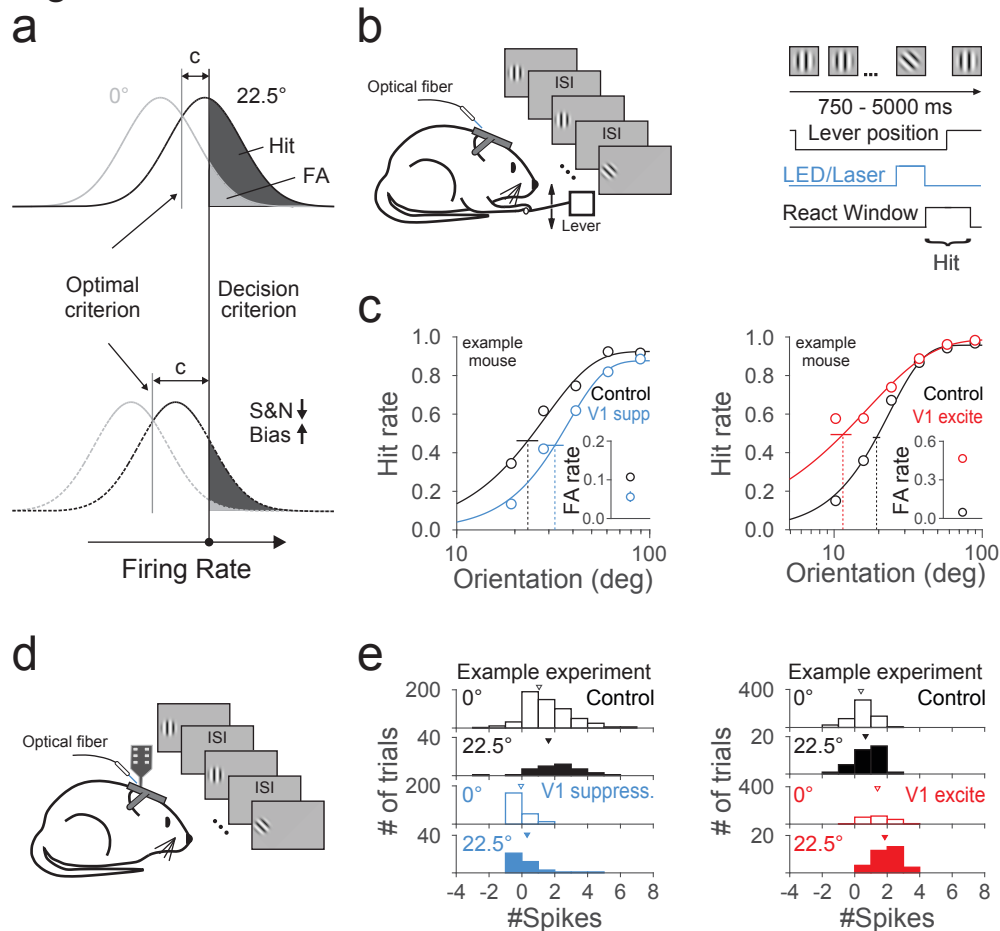

**Optogenetically suppressing or exciting V1 decreases or increases both signal and noise distributions in an orientation discrimination task.** (a) Schematic of effect of shifting signal and noise distributions on bias measured using signal detection theory. Top: distributions of target (22.5°, solid black) and distractor (0°, solid gray) responses. Note that bias ( $c$ ) is measured as the distance between the actual (black vertical line) and optimal ( $c=0$ , gray vertical line) criterion. Bottom: manipulations that decrease both the target and distractor distributions shift the optimal criterion to the left, and therefore result in an increase in bias. (b) Schematic of behavior setup and trial progression. Blue light is turned on for a single target or distractor presentation on each trial. V1 suppression (blue) and excitation (red) is achieved via optogenetically driving PV+ or VGAT+ neurons and Emx1+ neurons respectively. (c) Hit rate and FA rate (inset) for control (black) and V1 suppression (blue, left) or excitation (red, right) for one example mouse each. Hit rates are fit with a Weibull function; vertical dotted lines are threshold, error is 95% confidence interval. (d) Schematic of extracellular recording setup. Stimuli are presented as in b. (e) Distributions of spikes summed across a simultaneously recorded populations in response to distractor (0°, open bars) and target (22.5°, filled bars) stimuli on control trials (black) and during V1 suppression (blue,  $n=17$  cells, left) or excitation (red,  $n=16$  cells, right) for one example experiment each. Triangles show the mean of the distribution.

## Figure S1 – related to Figure 1

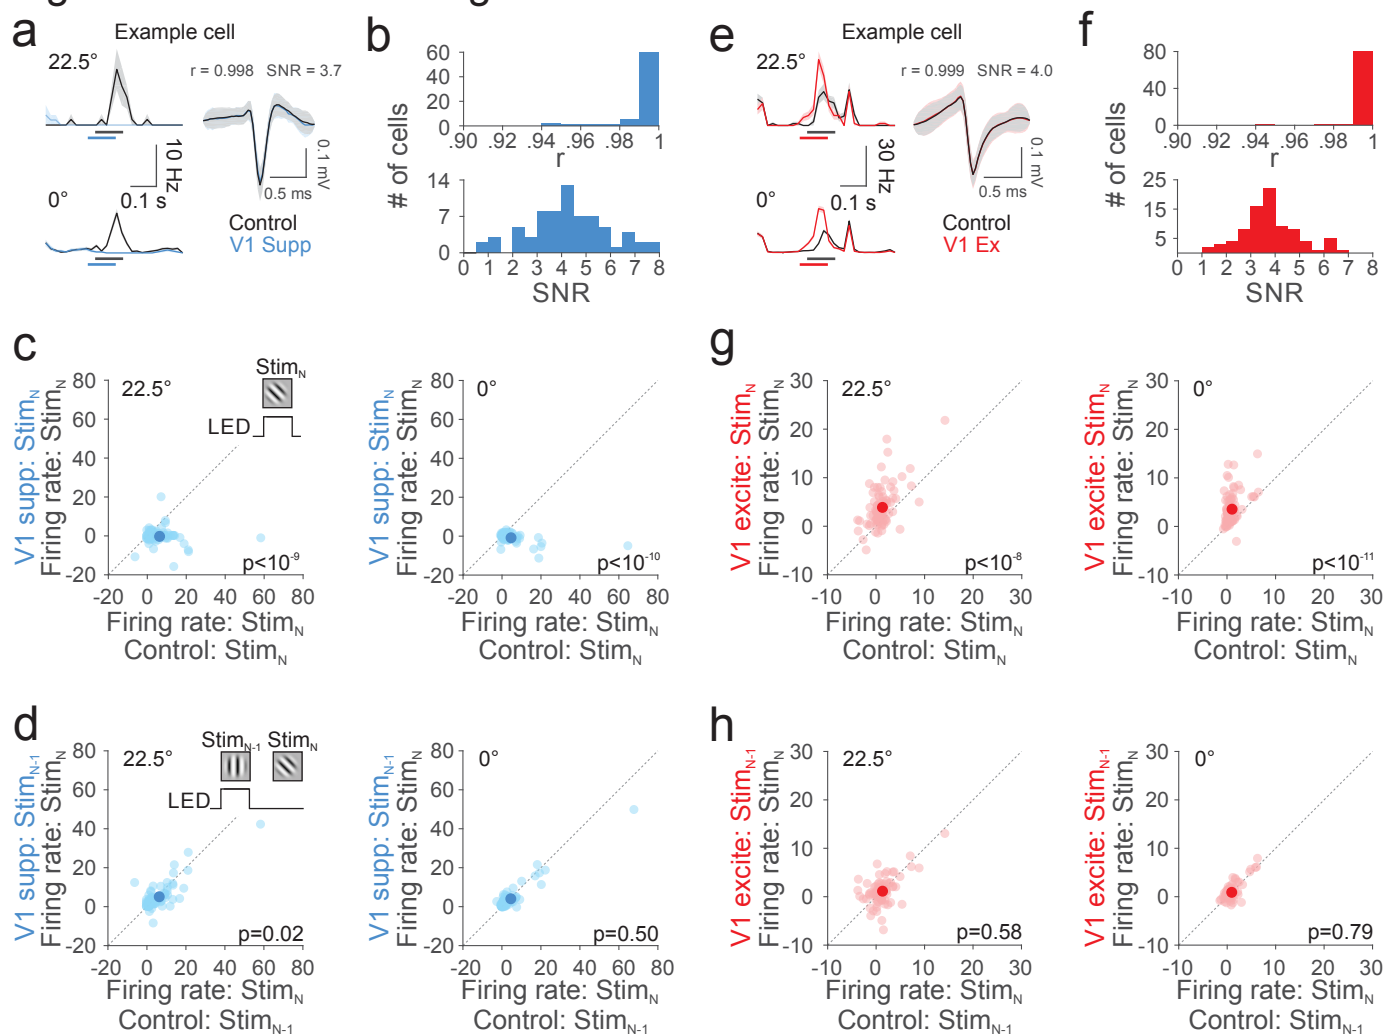

**Optogenetically suppressing or exciting V1 decreases or increases neuronal responses to both targets and distractors.** (a) Left: an example cell's responses to 22.5° target (top) and 0° distractor (bottom) for control (black) and V1 suppression (blue). Shaded areas are SEM across trials. Right: mean waveform shapes for control and V1 suppression for the same cell in the left. Shaded areas are SD across spikes. Correlation coefficient ( $r$ ) is shown to reveal the similarity in the waveform shapes between control and V1 suppression. Signal-to-noise ratio (SNR, mean/SD) of the trough value of the waveform is also shown. (b) Histogram of the correlation coefficient ( $r$ , top) and SNR values across all the cells ( $n=70$  cells). (c) Comparison of neuronal responses (FR in Hz) to the 22.5° target (left) and 0° distractor (right) between control and V1 suppression (blue) on the current stimulus ( $Stim_N$ ). Light colors are individual cells and dark colors are the mean of the populations. Error bars are SEM across 70 cells (3 mice). (d) Comparison of neuronal responses (FR in Hz) to the 22.5° target (left) and 0° distractor (right) on  $Stim_N$  when the previous stimulus ( $Stim_{N-1}$ ) was suppressed vs. control. (e-h) Same as a-d, for V1 excitation (red,  $n=83$  cells, 3 mice).

## Figure 2

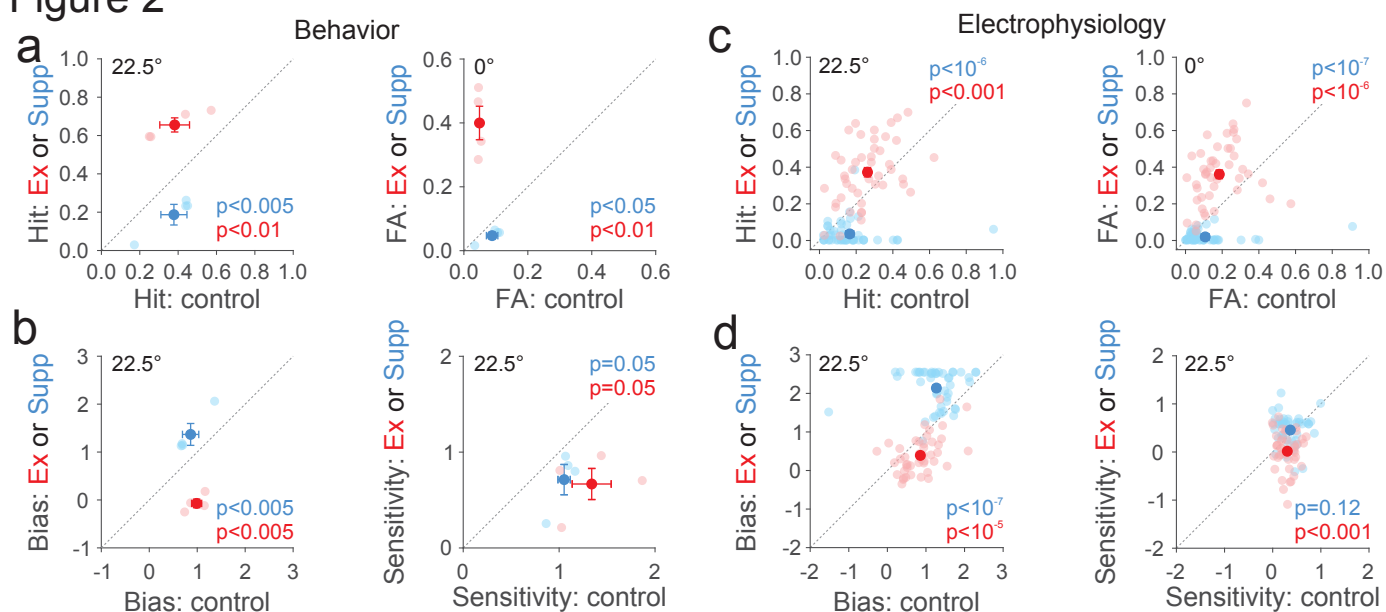

**Suppressing or exciting V1 increases or decreases behavioral and neuronal bias.** (a) Comparison of the hit (22.5°, left) and FA rate (0°, right) between control and V1 suppression (blue, n=4 mice) or excitation (red, n=4 mice). Light colors are individual mice and dark colors are the mean of the population. Error bars are SEM across mice. (b) Same as a, for bias (left) and sensitivity (right) at 22.5°. (c) Same as a, for predicted hit (22.5°, left) and FA rate (0°, right) from neuronal responses using a fixed criterion for each cell (see Methods). (d) Predicted bias (left) and sensitivity (right) using the predicted hit and FA rate in c. Extreme values of hit and FA rate were corrected (see Methods). Error bars are SEM across cells (V1 suppression-blue: n=47 cells, 3 mice; V1 excitation-red, n=45 cells, 3 mice).



## Figure S2 – related to Figure 2

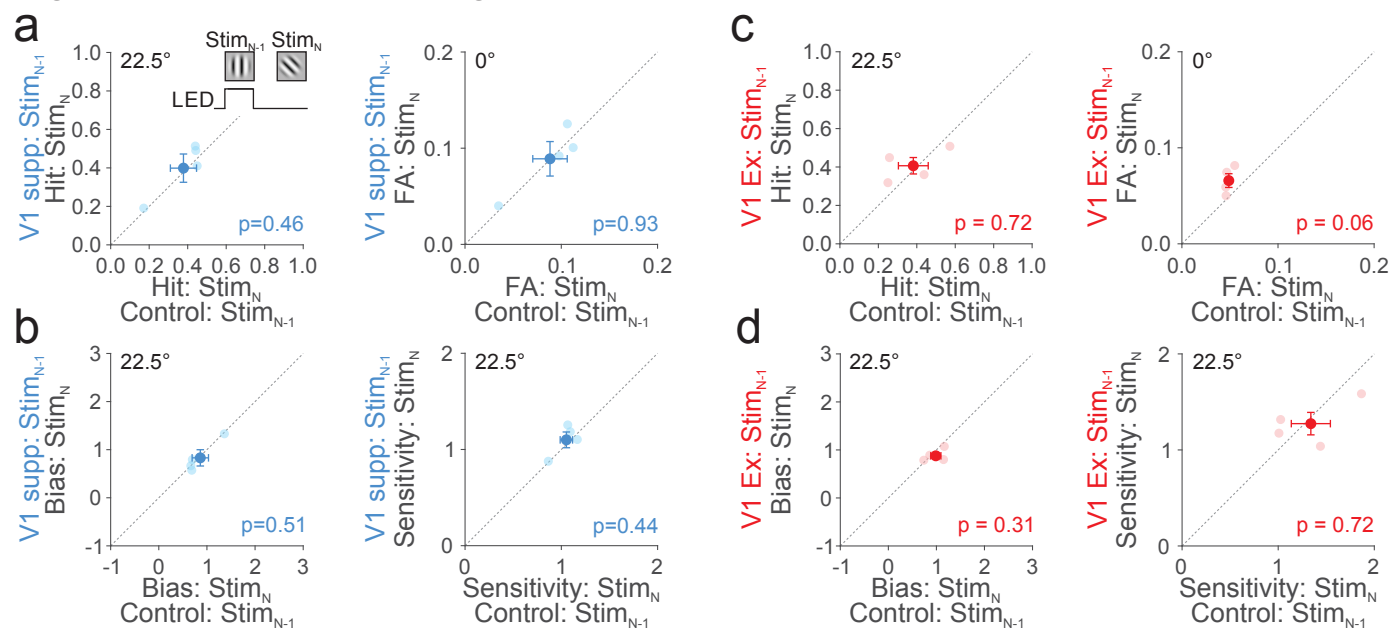

**Lack of effects of Stim<sub>N-1</sub> suppression or excitation on behavior measures at Stim<sub>N</sub>.** (a) Comparison of hit rate (22.5°, left) and FA rate (0°, right) at Stim<sub>N</sub> when Stim<sub>N-1</sub> was suppressed (blue) vs. control. Light colors are individual mice and dark colors are the mean of the populations. Error bars are SEM across mice (n=4 mice). (b) Same as a, for bias (left) and sensitivity (right) measures for 22.5° target. (c-d) Same as a-b, for V1 excitation (red, n=4 mice).

## Figure 3

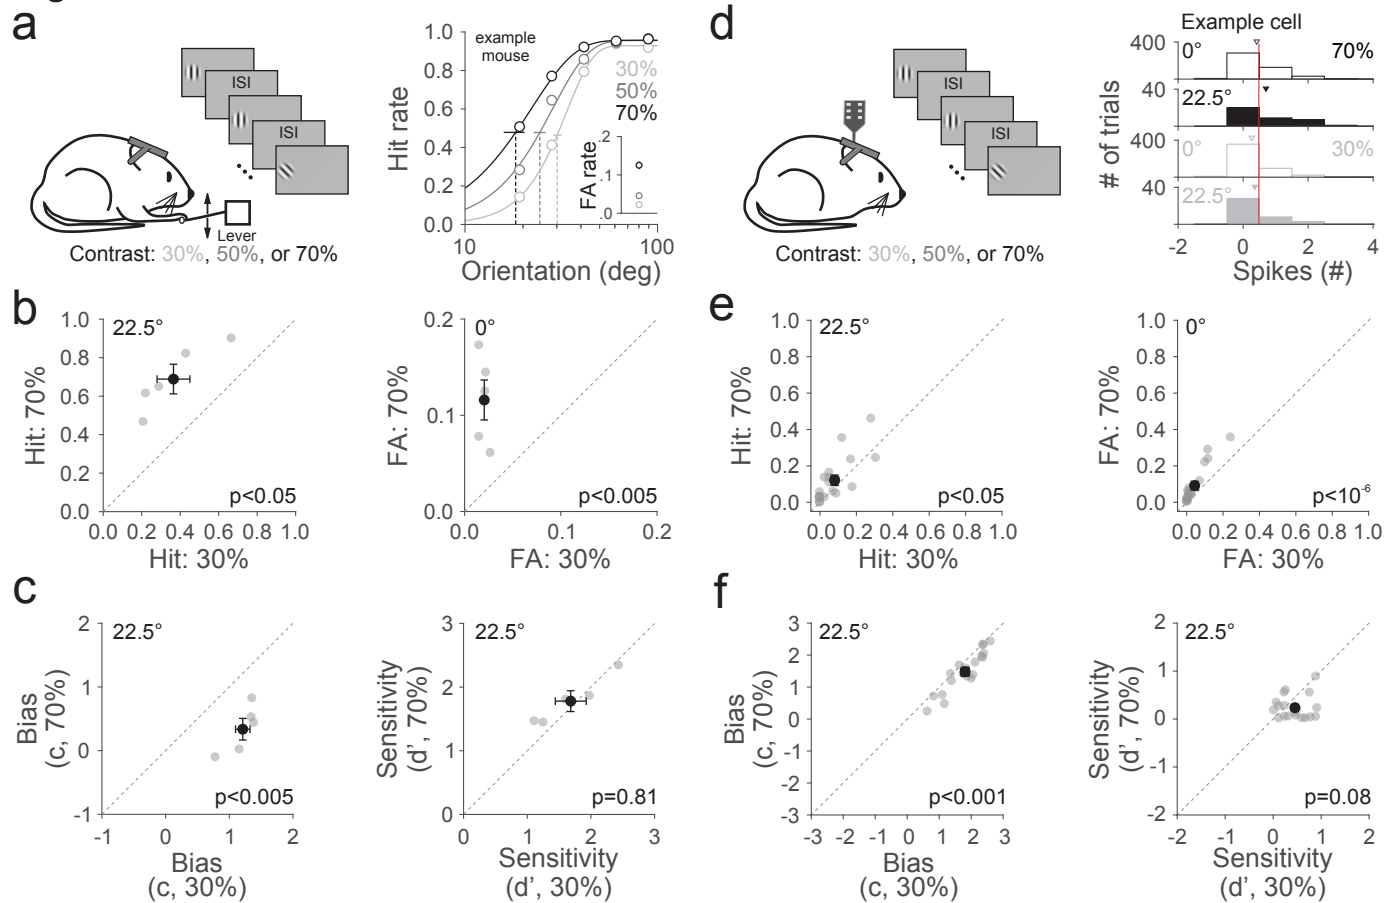

**Decreasing stimulus contrast decreases both hit and FA rate and increases behavioral and neuronal bias.** (a) Left: schematic of behavioral setup. Stimulus contrast is varied (30% (light gray), 50% (dark gray) or 70% (black)) on each stimulus presentation. Right: hit rate and FA rate (inset) for each contrast for an example mouse. Hit rates are fit with a Weibull function; vertical dotted lines are threshold, error is 95% confidence interval. (b) Comparison of hit (left, 22.5° target) and FA rate (right, 0° distractor) between two contrasts (70% vs 30%). Gray circles are individual mice and black circle is the mean of the population. Error bars are SEM across 5 mice. (c) Same as b, for bias (left) and sensitivity (right) at 22.5°. (d) Left: schematic of extracellular recording setup. Right: response distributions to distractor (0°, open bars) and target (22.5°, filled bars) stimuli of 30% (light gray) and 70% (black) contrast in an example cell. Triangles are the mean of the distribution. The criterion (vertical red line; see Methods) was determined for each cell and used to predict neuronal hit and false alarm rates for all contrasts. (e-f) Same as b-c, for predicted (e) hit and FA rate and (f) bias and sensitivity from the neuronal data (n = 19 cells, 4 mice).

## Figure S3 – related to Figure 3

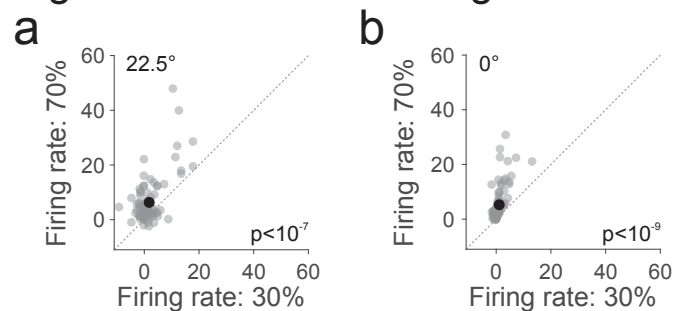

### **Reducing stimulus contrast reduces neuronal responses to both targets and distractors. (a)**

Comparison of neuronal responses (FR in Hz) to the 22.5° target between 30% and 70% contrasts. Gray circles are individual cells and black circle is the mean of the population. Error bars are SEM across 92 cells (4 mice). (b) Same as **a**, for responses to the 0° distractor.

## Figure 4

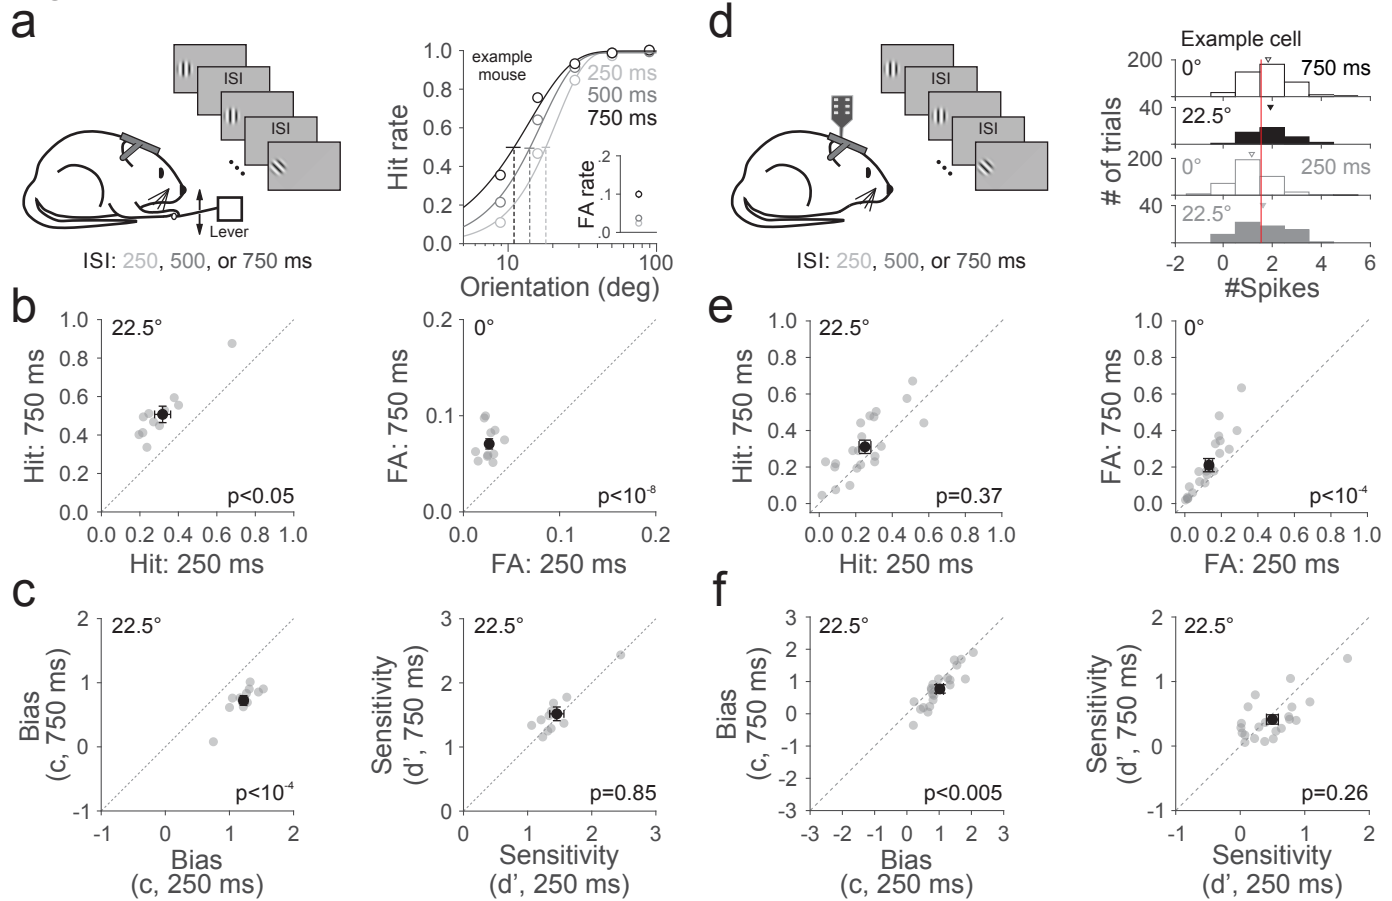

**Adaptation decreases both hit and FA rate and increases behavioral and neuronal bias.** (a) Left: schematic of behavioral setup. Inter-stimulus interval (ISI) is varied (250 ms (light gray), 500 ms (dark gray) or 750 ms (black)) on each stimulus presentation. Right: hit rate and FA rate (inset) for each ISI for an example mouse. Hit rates are fit with a Weibull function; vertical dotted lines are threshold, error is 95% confidence interval. (b) Comparison of hit (left, 22.5° target) and FA rate (right, 0° distractor) between two ISIs (750 vs. 250 ms). Gray circles are individual mice and black circle is the mean of the population. Error bars are SEM across 11 mice. (c) Same as **b**, for bias (left) and sensitivity (right) at 22.5°. (d) Left: schematic of extracellular recording setup. Right: response distributions to distractor (0°, open bars) and target (22.5°, filled bars) stimuli following 250 (gray) or 750 ms (black) ISI for an example cell. Triangles show the mean of the distribution. The criterion (vertical red line; see Methods) was determined for each cell and used to predict neuronal hit and false alarm rates for all ISIs. (e-f) Same as **b-c**, for predicted (e) hit and FA rate and (f) bias and sensitivity from the neuronal data ( $n = 21$  cells, 4 mice).

## Figure S4 – related to Figure 4

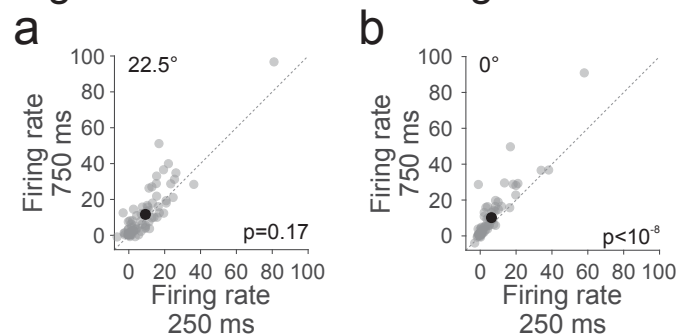

**Adaptation reduces neuronal responses to both targets and distractors.** (a) Comparison of neuronal responses (FR in Hz) to the 22.5° target after 750 or 250 ms ISIs. Gray circles are individual cells and black circle is the mean of the population. Error bars are SEM across 74 cells (4 mice). (b) Same as a, for responses to the 0° distractor.
